# Supplementary material for: Enhanced Acetaminophen Electrochemical Sensing Based on Nitrogen-Doped Graphene
Source: MDPI journal article supplement (doi:10.3390/ijms232314866), 2022-11-28
Supplement: s1 [file s1]

## Electronic Supplementary Materials

# Enhanced Acetaminophen Electrochemical Sensing Based on Nitrogen-Doped Graphene

Lidia Magerusan \*, Florina Pogacean \* and Stela Pruneanu

National Institute for Research and Development of Isotopic and Molecular Technologies,  
Donat Street, No. 67-103, 400293 Cluj-Napoca, Romania

\* Correspondence: lidia.magerusan@itim-cj.ro (L.M.); florina.pogacean@itim-cj.ro (F.P.)

Table S1. Deconvolution results corresponding to high resolution *C1s*, *O1s* and *N1s* XPS spectra of exf-NGr material

| C 1s            |                   |          | O 1s            |                           |          | N 1s            |                   |          |
|-----------------|-------------------|----------|-----------------|---------------------------|----------|-----------------|-------------------|----------|
| <i>position</i> | <i>assignment</i> | <i>%</i> | <i>position</i> | <i>assignment</i>         | <i>%</i> | <i>position</i> | <i>assignment</i> | <i>%</i> |
| 284.21          | C sp <sup>2</sup> | 47.13    | 531.09          | C-O                       | 31.25    | 398.12          | pyridinic N       | 17.72    |
| 285.23          | C sp <sup>3</sup> | 15.74    | 532.50          | O-C=O/COOH                | 58.75    | 399.76          | pyrrolic N        | 52.13    |
| 286.31          | C-O/C-N           | 12.76    | 535.45          | Adsorbed H <sub>2</sub> O | 10.00    | 401.57          | graphitic N       | 30.15    |
| 287.33          | C=O               | 9.27     |                 |                           |          |                 |                   |          |
| 288.77          | O-C=O/COOH        | 11.82    |                 |                           |          |                 |                   |          |
| 291.30          | $\pi$ - $\pi$ *   | 3.28     |                 |                           |          |                 |                   |          |

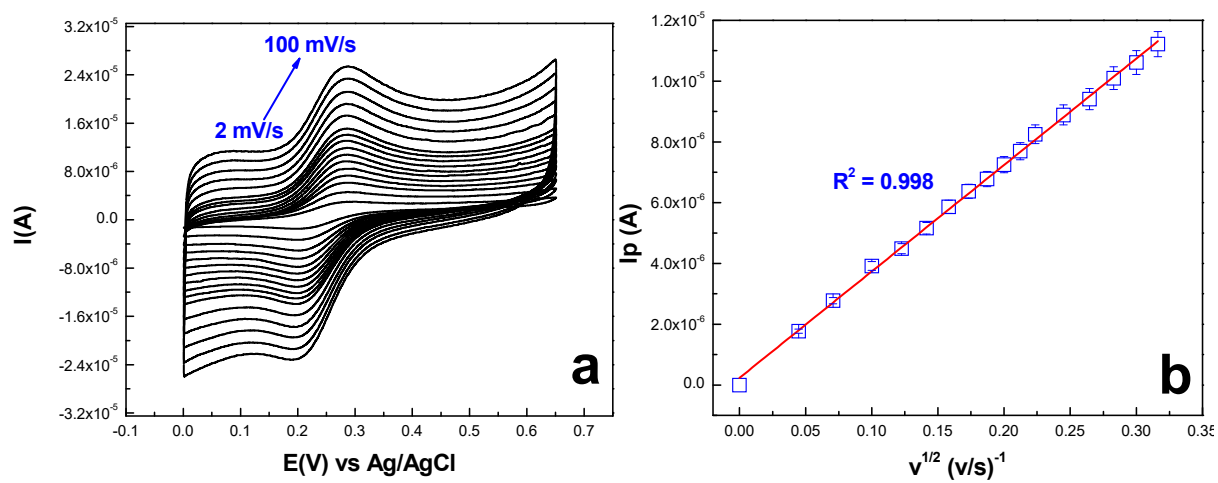

Figure S1. (a) Cyclic voltammetric response of exf-NGr/GCE surface in the presence of 1mM  $K_4[Fe(CN)_6]$  at various scan rates (from 2 to 100 mV/s; 0.2 M KCl supporting electrolyte); (b) Linear plot of anodic peak current ( $I_p$ ) vs  $v^{1/2}$

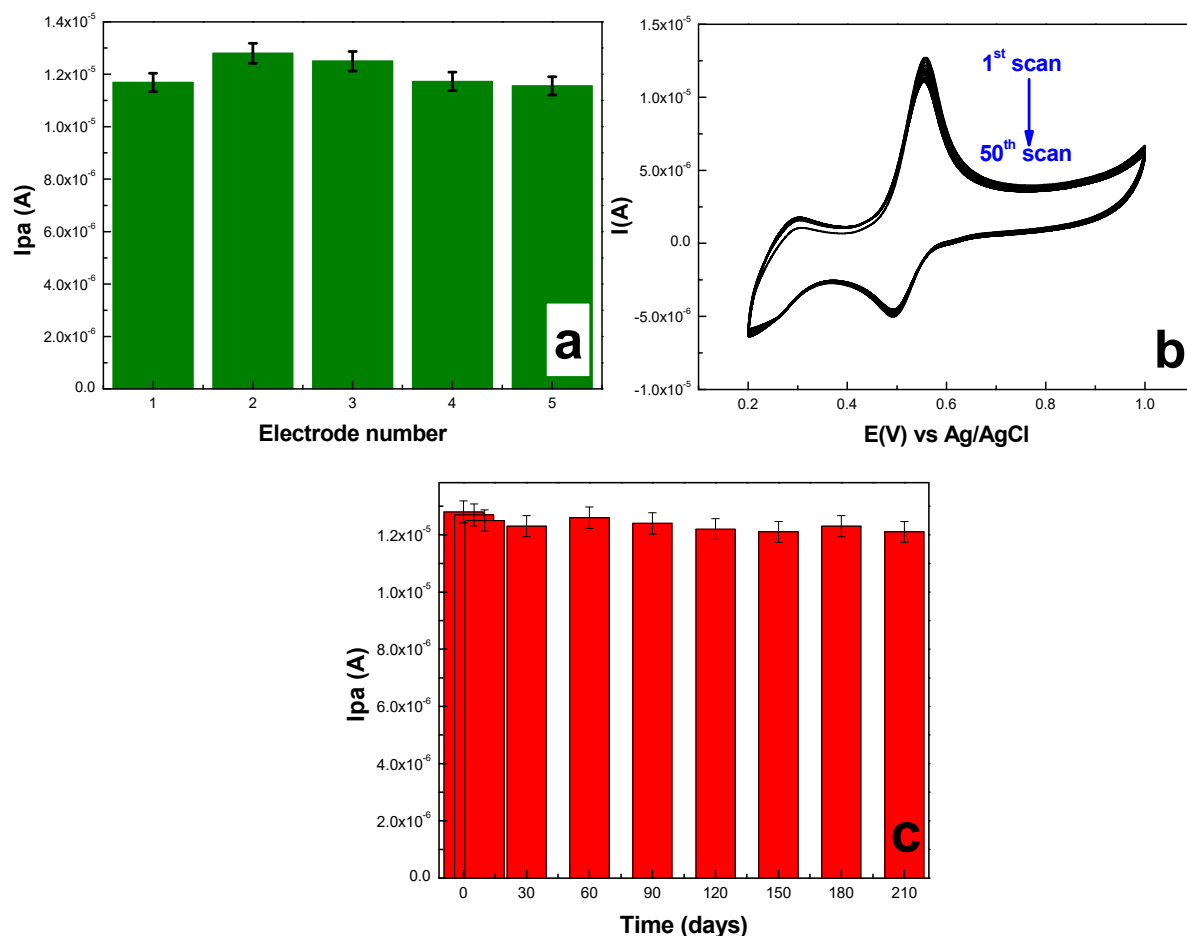

Figure S2. (a) Anodic peak current for five modified electrodes obtained from CV measurements *versus* 100  $\mu$ M AMP in acetate buffer pH 4.4 solution, scan rate 10 mV/s; (c) 50 consecutive measurements in 100  $\mu$ M AMP solution (pH 4.4 acetate buffer), recorded with exf-NGr/GCE (scan rate 10 mV/s); (d) CV response of exf-NGr/GCE electrode in 100  $\mu$ M AMP solution (pH 4.4 acetate buffer), obtained in replicate measurements over 210 days; scan rate 10 mV/s

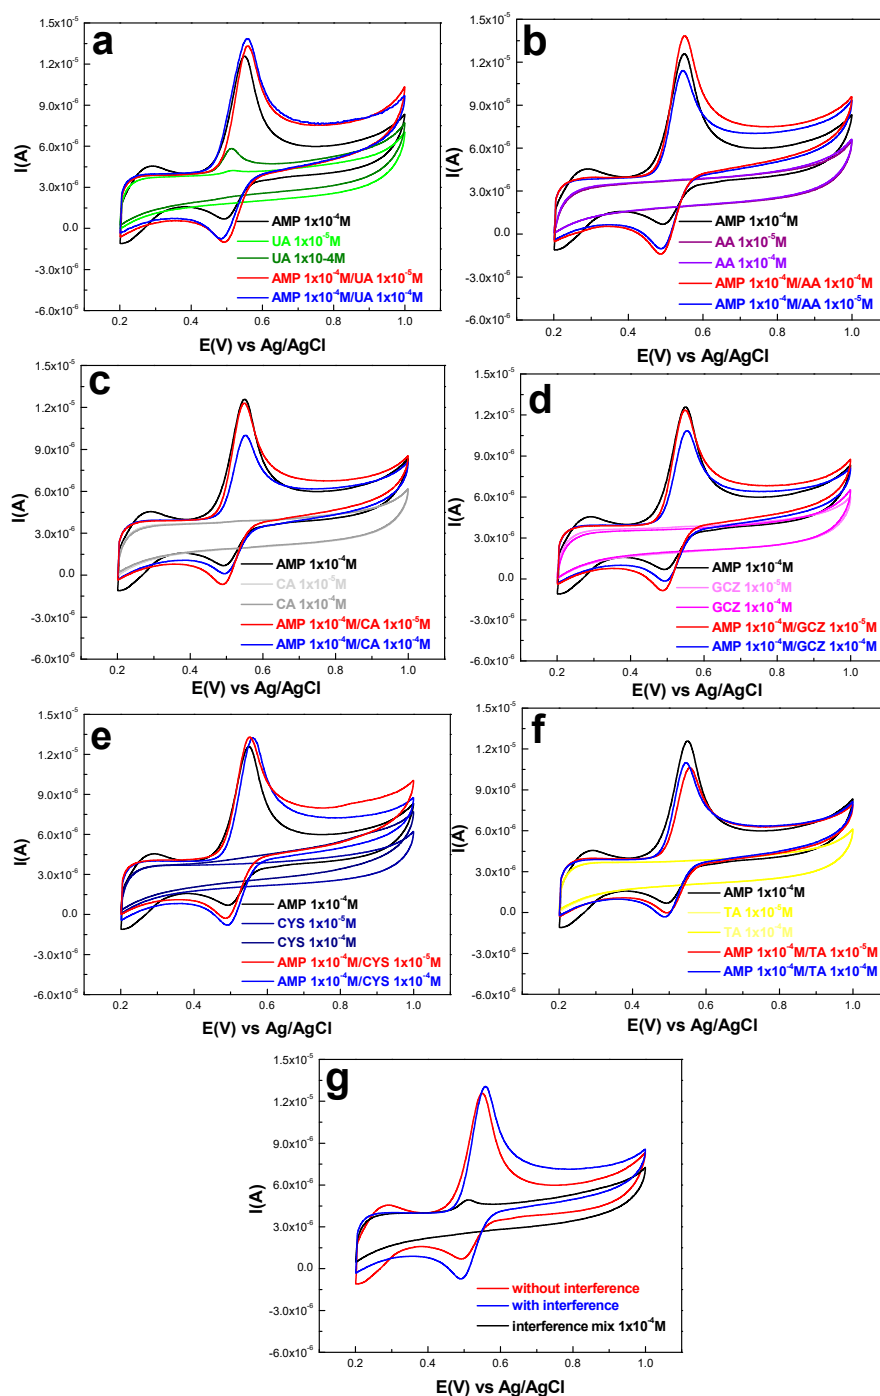

Figure S3. CV response of exf-NGr/GCE modified electrode towards 100  $\mu\text{M}$  AMP in the presence of different interfering molecules - set at two fix concentration 10  $\mu\text{M}$  and 100  $\mu\text{M}$ ): (a) uric acid (UA); (b) ascorbic acid (AA); (c) citric acid (CA); (d) glucose (GCZ); (e) cysteine (CYS); (f) tartaric acid (TA); (g) complex interfering matrix containing UA, AA, CA, GCZ, CYS and TA (100  $\mu\text{M}$ ); supporting electrolyte acetate buffer (pH 4.4) solution; scan rate 10 mV/s

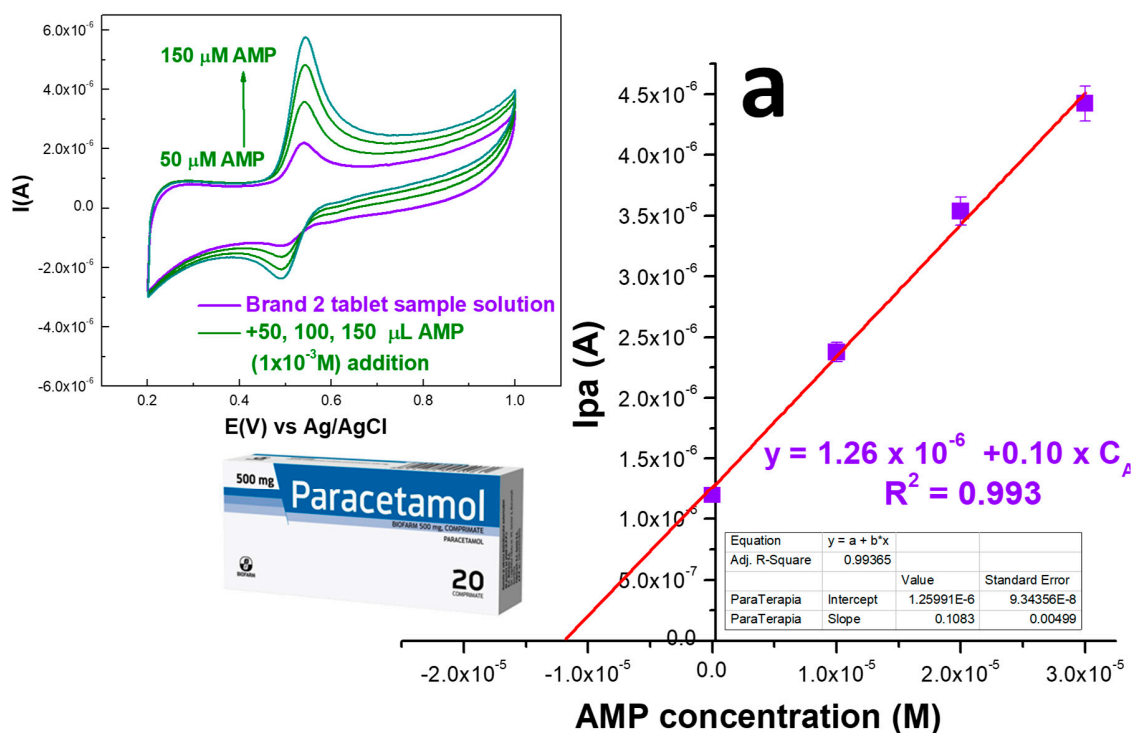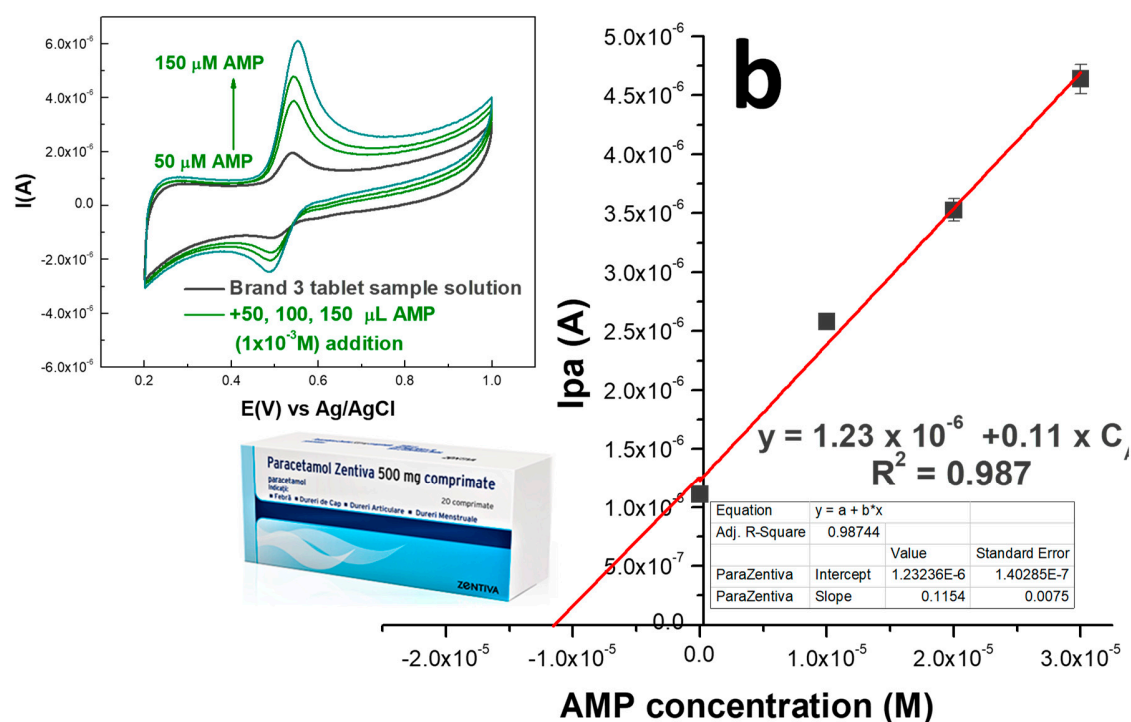

Figure S4. Calibration plot obtained for the standard addition method in case of paracetamol containing solutions obtained from Brand 2 and Brand 3 real tablet samples;

*Inset:* CVs recorded after spiking AMP from the stock solution (1 mM) - supporting electrolyte acetate buffer (pH 4.4) solution; scan rate 10 mV/s.

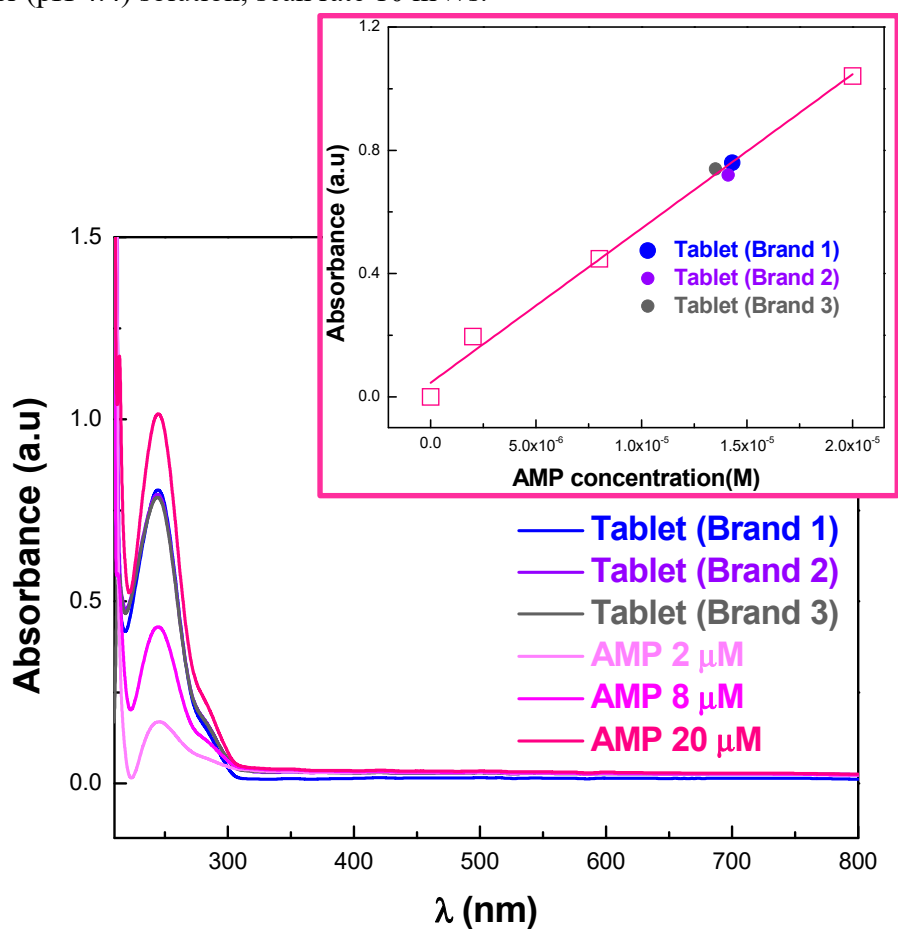

Figure S5. UV-Vis absorption spectra obtained for several solutions of known AMP concentration (2  $\mu$ M; 8  $\mu$ M; 20  $\mu$ M) and for paracetamol containing solutions obtained from Brand 2 and Brand 3 real tablet samples (AMP concentration 13.2  $\mu$ M);

*Inset:* The corresponding calibration curve
